# Supplementary material for: Clinical Assessment of Judgment in Adults and the Elderly: Development and Validation of the Three Domains of Judgment Test—Clinical Version (3DJT-CV)
Source: MDPI journal article supplement (doi:10.3390/jcm12113740), 2023-05-29
Supplement: s1 [file s1]

## **Supplementary Materials**

*Acceptability scale for administration to patients:*

|                     |                                            |                                            |                   |
|---------------------|--------------------------------------------|--------------------------------------------|-------------------|
| <i>Inacceptable</i> | <i>Acceptable with major modifications</i> | <i>Acceptable with minor modifications</i> | <i>Acceptable</i> |
|---------------------|--------------------------------------------|--------------------------------------------|-------------------|

*Rating scale to assess the relevance of the item, the clarity of its statement and the relevance and quality of the scenario's images*

|                  |             |            |      |           |           |
|------------------|-------------|------------|------|-----------|-----------|
| 0                | 1           | 2          | 3    | 4         | 5         |
| Very unsatisfied | Unsatisfied | Borderline | Good | Very good | Excellent |

*Scale to assess the ecological validity of the scenario (Do you think such a situation might occur in a person's daily life?):*

|            |               |          |          |               |            |
|------------|---------------|----------|----------|---------------|------------|
| 0          | 1             | 2        | 3        | 4             | 5          |
| Impossible | Very unlikely | Unlikely | Probable | Very probable | Assuringly |

*Scale to assess scenario difficulty:*

|          |           |      |          |           |                |
|----------|-----------|------|----------|-----------|----------------|
| 0        | 1         | 2    | 3        | 4         | 5              |
| Too easy | Very easy | Easy | Moderate | Difficult | Very difficult |

**Figure S1:** Rating scales used by experts to assess various aspects of each of the vignettes in the 3DJT

**Table S1.** Composition of the expert panel by gender, profession, and years in practice

|                   |                                                                |    |
|-------------------|----------------------------------------------------------------|----|
| Gender            | Female                                                         | 25 |
|                   | Male                                                           | 7  |
| Profession        | Neurology, neuropsychiatry, or consultation-liaison psychiatry | 5  |
|                   | Geriatric psychiatry                                           | 10 |
|                   | Geriatrics                                                     | 3  |
|                   | Neuropsychologist                                              | 11 |
|                   | Occupational therapist                                         | 3  |
| Years in practice | < 5 years                                                      | 4  |
|                   | 5-10 years                                                     | 6  |
|                   | 11-15 years                                                    | 10 |
|                   | > 15 years                                                     | 12 |

**Table S2. Results of expert ratings**

The test originally consisted of a total of 72 scenarios divided into three subtests of 24 scenarios, with each subtest assessing one of the three main domains of judgment (moral, practical, and social). Each subtest consisted of 12 Type G scenarios and 12 type A scenarios. After expert evaluation, 18 scenarios assessing practical judgment (10 type G and 8 type A), 18 scenarios assessing moral judgment (8 type G and 10 type A), and 20 scenarios assessing social judgment (11 type G and 9 type A) were accepted for phase 2 of the study.

|                                                        | <b>Practical Judgment<br/>Subtest</b>       | <b>Moral Judgment<br/>Subtest</b>           | <b>Social Judgment<br/>Subtest</b>          | <b>Total</b>                                                      |
|--------------------------------------------------------|---------------------------------------------|---------------------------------------------|---------------------------------------------|-------------------------------------------------------------------|
| <b>Type G scenario</b><br>(generation of<br>solutions) | 10 accepted<br>1 borderline<br>1 eliminated | 8 accepted<br>2 borderline<br>2 eliminated  | 11 accepted<br>1 borderline<br>0 eliminated | 29 accepted<br>4 borderline<br>3 eliminated                       |
| <b>Type A scenario</b><br>(alternative<br>scenario)    | 8 accepted<br>2 borderline<br>2 eliminated  | 10 accepted<br>1 borderline<br>1 eliminated | 9 accepted<br>3 borderline<br>0 eliminated  | 27 accepted<br>6 borderline<br>3 eliminated                       |
| <b>Total</b>                                           | 18 accepted<br>3 borderline<br>3 eliminated | 18 accepted<br>3 borderline<br>3 eliminated | 20 accepted<br>4 borderline<br>0 eliminated | <b>56 accepted</b><br><b>10 borderline</b><br><b>6 eliminated</b> |

**Table S3: Scenario quality measurements results (healthy participants assessment) (M-ÉT)**

Results of measures of clarity, ecological validity, difficulty, and level of emotions generated per scenario. Ratings range from 0 to 5, where 0 is a null value and 5 is the maximum value that can be assigned by the participant. M: mean, SD: standard deviation.

| Scenario (version-n°) | Clarity      | Ecological validity | Difficulty   | Emotions triggered |
|-----------------------|--------------|---------------------|--------------|--------------------|
| A-1                   | 4.07 ± 0.979 | 4.07 ± 0.900        | 2.64 ± 1.129 | 3.11 ± 1.066       |
| A-2                   | 4.07 ± 0.858 | 3.64 ± 1.096        | 2.21 ± 1.067 | 1.18 ± 1.056       |
| A-3                   | 4.46 ± 0.744 | 4.11 ± 1.166        | 1.71 ± 0.763 | 1.18 ± 1.249       |
| A-4                   | 4.25 ± 0.844 | 4.04 ± 0.922        | 1.89 ± 0.944 | 1.25 ± 1.175       |
| A-5                   | 3.93 ± 0.766 | 3.93 ± 0.940        | 2.11 ± 1.133 | 1.75 ± 1.378       |
| A-6                   | 3.82 ± 0.83  | 4.32 ± 0.863        | 2.57 ± 1.168 | 1.82 ± 1.307       |
| A-7                   | 4.29 ± 0.763 | 4.07 ± 0.900        | 1.71 ± 0.854 | 1.14 ± 1.113       |
| A-8                   | 4.18 ± 0.863 | 4.14 ± 0.970        | 1.61 ± 0.737 | 1.14 ± 1.113       |
| A-9                   | 3.68 ± 0.945 | 3.32 ± 1.219        | 2.18 ± 0.983 | 1.93 ± 1.245       |
| A-10                  | 3.79 ± 0.957 | 3.93 ± 1.120        | 2.18 ± 1.124 | 1.71 ± 1.213       |
| A-11                  | 4.29 ± 0.713 | 2.68 ± 1.362        | 2.18 ± 1.124 | 1.71 ± 1.301       |
| A-12                  | 3.93 ± 0.940 | 4.29 ± 0.854        | 2.00 ± 0.943 | 1.14 ± 1.177       |
| A-13                  | 4.14 ± 0.848 | 4.25 ± 0.844        | 1.79 ± 0.876 | 1.14 ± 1.145       |
| A-14                  | 3.71 ± 1.013 | 4.18 ± 1.056        | 2.07 ± 0.979 | 1.18 ± 1.188       |
| A-15                  | 4.21 ± 0.876 | 3.71 ± 0.897        | 2.04 ± 1.036 | 2.54 ± 1.319       |
| A-16                  | 3.96 ± 1.036 | 3.57 ± 1.103        | 2.07 ± 0.979 | 2.46 ± 1.319       |
| A-17                  | 4.11 ± 0.875 | 3.43 ± 0.959        | 1.71 ± 1.013 | 1.11 ± 0.994       |
| A-18                  | 4.18 ± 0.772 | 3.00 ± 1.388        | 2.18 ± 1.124 | 2.61 ± 1.370       |
| A-19                  | 4.11 ± 0.875 | 3.64 ± 1.096        | 1.75 ± 0.799 | 1.46 ± 1.105       |
| A-20                  | 4.00 ± 1.018 | 3.21 ± 1.343        | 2.75 ± 1.206 | 2.57 ± 1.317       |
| A-21                  | 4.07 ± 0.940 | 2.96 ± 1.201        | 2.32 ± 1.020 | 1.39 ± 1.257       |
| A-22                  | 4.07 ± 0.900 | 2.82 ± 1.335        | 2.04 ± 1.177 | 1.93 ± 1.274       |
| A-23                  | 4.32 ± 0.670 | 3.11 ± 1.286        | 2.07 ± 1.331 | 2.00 ± 1.540       |
| A-24                  | 4.15 ± 0.818 | 2.93 ± 1.141        | 2.67 ± 1.177 | 2.70 ± 1.382       |
| A-25                  | 4.21 ± 0.787 | 2.93 ± 1.359        | 2.11 ± 1.031 | 1.50 ± 1.262       |
| A-26                  | 4.29 ± 0.854 | 3.11 ± 1.423        | 2.25 ± 1.076 | 1.61 ± 1.315       |
| A-27                  | 3.82 ± 0.905 | 4.00 ± 1.388        | 2.04 ± 1.170 | 0.71 ± 0.976       |
| A-28                  | 4.07 ± 0.900 | 4.25 ± 1.005        | 1.93 ± 0.900 | 1.32 ± 1.219       |
| B-1                   | 4.47 ± 0.788 | 4.32 ± 0.945        | 2.03 ± 0.969 | 1.24 ± 1.075       |
| B-2                   | 4.50 ± 0.615 | 1.59 ± 1.158        | 2.03 ± 0.904 | 1.76 ± 1.130       |
| B-3                   | 4.32 ± 0.727 | 3.88 ± 0.844        | 1.94 ± 0.776 | 1.56 ± 1.160       |
| B-4                   | 4.47 ± 0.615 | 4.50 ± 0.749        | 1.50 ± 0.615 | 2.09 ± 1.334       |
| B-5                   | 4.21 ± 0.845 | 3.06 ± 1.229        | 1.88 ± 0.913 | 1.62 ± 1.155       |
| B-6                   | 4.18 ± 0.869 | 3.18 ± 1.267        | 1.94 ± 0.983 | 1.26 ± 1.263       |
| B-7                   | 4.38 ± 0.817 | 4.12 ± 0.769        | 1.97 ± 0.904 | 1.74 ± 1.310       |
| B-8                   | 4.26 ± 0.751 | 2.91 ± 1.083        | 2.09 ± 1.111 | 2.12 ± 1.452       |
| B-9                   | 4.44 ± 0.746 | 4.41 ± 0.857        | 1.82 ± 1.058 | 2.24 ± 1.458       |
| B-10                  | 4.38 ± 0.779 | 4.26 ± 1.286        | 1.47 ± 0.961 | 1.32 ± 1.093       |
| B-11                  | 4.29 ± 0.760 | 3.21 ± 1.067        | 2.32 ± 1.224 | 2.65 ± 1.203       |
| B-12                  | 4.26 ± 0.790 | 3.82 ± 0.936        | 2.03 ± 0.937 | 1.97 ± 1.314       |
| B-13                  | 4.44 ± 0.660 | 3.91 ± 1.264        | 1.65 ± 0.849 | 1.26 ± 1.214       |

|      |                  |                  |                  |                  |
|------|------------------|------------------|------------------|------------------|
| B-14 | $4.29 \pm 0.836$ | $2.59 \pm 1.019$ | $2.24 \pm 1.046$ | $2.35 \pm 1.323$ |
| B-15 | $4.32 \pm 0.843$ | $3.29 \pm 1.244$ | $1.85 \pm 0.857$ | $1.44 \pm 1.307$ |
| B-16 | $4.21 \pm 0.770$ | $3.97 \pm 1.058$ | $2.21 \pm 0.978$ | $1.85 \pm 1.234$ |
| B-17 | $4.47 \pm 0.706$ | $3.85 \pm 1.048$ | $1.62 \pm 0.652$ | $1.76 \pm 1.394$ |
| B-18 | $4.24 \pm 0.741$ | $2.82 \pm 0.968$ | $2.03 \pm 0.870$ | $1.71 \pm 1.382$ |
| B-19 | $4.32 \pm 0.684$ | $3.71 \pm 1.031$ | $1.76 \pm 0.781$ | $1.21 \pm 1.067$ |
| B-20 | $4.32 \pm 0.684$ | $3.94 \pm 1.153$ | $1.65 \pm 0.774$ | $1.47 \pm 1.080$ |
| B-21 | $4.32 \pm 0.684$ | $4.03 \pm 1.000$ | $1.88 \pm 0.977$ | $1.68 \pm 1.364$ |
| B-22 | $4.32 \pm 0.727$ | $3.12 \pm 1.066$ | $2.74 \pm 1.163$ | $2.50 \pm 1.441$ |
| B-23 | $4.24 \pm 0.781$ | $3.56 \pm 1.236$ | $2.12 \pm 0.844$ | $1.74 \pm 1.163$ |
| B-24 | $4.00 \pm 0.921$ | $3.56 \pm 1.353$ | $1.82 \pm 0.834$ | $1.21 \pm 1.067$ |
| B-25 | $4.21 \pm 0.770$ | $2.53 \pm 0.961$ | $2.62 \pm 1.280$ | $2.56 \pm 1.397$ |
| B-26 | $4.18 \pm 0.869$ | $3.21 \pm 1.493$ | $1.94 \pm 0.983$ | $1.32 \pm 1.296$ |
| B-27 | $4.00 \pm 1.015$ | $2.03 \pm 1.243$ | $3.44 \pm 1.418$ | $2.88 \pm 1.409$ |
| B-28 | $4.41 \pm 0.657$ | $4.53 \pm 0.706$ | $1.56 \pm 0.660$ | $0.88 \pm 0.880$ |

**Table S4 : Results of correlations between the 3DJT score per scenario and the scores on different cognitive tests**

The scenarios whose designation starts with the letter A correspond to version A and the ones whose designation starts with the letter B to version B.

| Scenarios | Type     | JAT     | Rey     | Fluency | Emotions |
|-----------|----------|---------|---------|---------|----------|
| A-1       | M type E | 0.432*  | -0.278  | 0.450*  | -0.031   |
| A-2       | P type G | 0.397*  | 0.043   | 0.222   | 0.058    |
| A-3       | S type E | 0.147   | -0.149  | 0.272   | 0.416*   |
| A-4       | S type G | 0.176   | -0.464* | 0.106   | -0.089   |
| A-5       | M type G | 0.339†  | -0.230  | 0.269   | 0.168    |
| A-6       | P type E | -0.007  | -0.076  | 0.092   | 0.101    |
| A-7       | S type G | 0.299   | -0.181  | 0.191   | 0.079    |
| A-8       | P type G | 0.156   | -0.334† | 0.326†  | 0.015    |
| A-9       | P type E | 0.362†  | -0.122  | 0.221   | 0.102    |
| A-10      | M type G | 0.425*  | -0.230  | 0.479** | -0.069   |
| A-11      | M type E | 0.330†  | -0.330† | 0.307   | 0.076    |
| A-12      | S type E | 0.526** | -0.484* | 0.325†  | 0.040    |
| A-13      | P type G | 0.230   | -0.410* | 0.288   | -0.075   |
| A-14      | P type G | -0.039  | -0.329† | -0.066  | -0.241   |
| A-15      | M type E | 0.341†  | -0.236  | 0.451*  | 0.344†   |
| A-16      | S type G | 0.163   | -0.097  | 0.247   | 0.332†   |
| A-17      | P type G | 0.048   | -0.003  | 0.271   | 0.012    |
| A-18      | M type G | 0.207   | -0.167  | 0.351†  | 0.055    |
| A-19      | S type G | 0.113   | -0.089  | 0.107   | 0.159    |
| A-20      | M type E | 0.403*  | -0.004  | 0.229   | 0.212    |
| A-21      | S type G | 0.361†  | 0.253   | 0.201   | -0.084   |
| A-22      | M type G | 0.292   | -0.019  | 0.346†  | 0.242    |
| A-23      | P type E | 0.376*  | -0.038  | 0.428*  | 0.242    |
| A-24      | M type E | 0.448*  | -0.107  | 0.458*  | 0.265    |
| A-25      | S type E | 0.443*  | -0.117  | 0.386*  | 0.388*   |

|      |          |         |         |         |        |
|------|----------|---------|---------|---------|--------|
| A-26 | S type G | 0.358†  | -0.182  | 0.359†  | 0.318† |
| A-27 | P type E | 0.403*  | -0.001  | 0.414*  | 0.393* |
| A-28 | S type E | 0.566** | -0.130  | 0.392*  | 0.350† |
| B-1  | S type E | 0.364*  | -0.326† | 0.472** | -0.087 |
| B-2  | M type G | 0.263   | -0.059  | 0.218   | 0.326† |
| B-3  | P type G | 0.372*  | -0.297  | 0.343*  | 0.048  |
| B-4  | S type G | 0.258   | -0.102  | 0.163   | 0.021  |
| B-5  | S type E | 0.161   | -0.265  | 0.382*  | 0.077  |
| B-6  | M type E | 0.462** | -0.255  | 0.188   | 0.197  |
| B-7  | P type E | 0.276   | -0.139  | 0.356*  | 0.001  |
| B-8  | M type E | 0.372*  | -0.139  | 0.306†  | 0.038  |
| B-9  | S type E | 0.196   | 0.015   | 0.177   | 0.090  |
| B-10 | P type G | 0.423*  | -0.271  | 0.433*  | 0.071  |
| B-11 | M type E | 0.216   | 0.078   | -0.089  | -0.054 |
| B-12 | S type G | 0.069   | -0.052  | 0.285   | 0.084  |
| B-13 | S type E | 0.261   | 0.054   | 0.264   | 0.031  |
| B-14 | P type E | 0.529** | -0.119  | 0.313†  | 0.146  |
| B-15 | P type G | 0.136   | -0.152  | 0.236   | 0.108  |
| B-16 | M type E | 0.239   | -0.143  | 0.075   | 0.030  |
| B-17 | S type G | 0.554** | -0.131  | 0.443** | 0.177  |
| B-18 | M type G | 0.371*  | -0.122  | 0.546** | 0.093  |
| B-19 | S type G | 0.392*  | -0.176  | 0.367*  | -0.047 |
| B-20 | S type G | 0.374*  | -0.014  | 0.304†  | 0.125  |
| B-21 | P type E | 0.152   | -0.269  | 0.430*  | -0.022 |
| B-22 | M type G | 0.233   | -0.223  | 0.367*  | 0.086  |
| B-23 | S type E | 0.425*  | -0.235  | 0.518** | 0.117  |
| B-24 | P type G | 0.331†  | -0.002  | 0.404*  | 0.034  |
| B-25 | M type G | -0.099  | -0.090  | 0.197   | 0.031  |
| B-26 | P type E | 0.427*  | 0.107   | 0.342*  | 0.194  |

|      |          |       |        |         |       |
|------|----------|-------|--------|---------|-------|
| B-27 | M type E | 0.094 | -0.263 | 0.351*  | 0.103 |
| B-28 | P type G | 0.241 | 0.010  | 0.512** | 0.096 |

P: scenarios of the practical judgment assessment subtest, M: scenarios of the moral judgment assessment subtest, S: scenarios of the social judgment assessment subtest, G: scenario measuring solution generation, E: scenario measuring solution evaluation, JAT: Judgment Assessment Tool, Rey: 15-word Test (number of trials needed to correctly recall the 15-word list), Fluency: Semantic Fluency Test, Emotions: Facial Emotions Stimuli (Ekman and Friesen), \*: significant results ( $p < 0.05$ ), \*\*: highly significant results ( $p \leq 0.01$ ), †: statistical trend ( $0.10 \geq p \text{ value} > 0.05$ ).



**Table S5: Cronbach coefficient**

Cronbach's alphas are presented by subtest (practical, moral or social) and by version of the test (A or B).

| <b>Version and subtest</b>               | <b>Cronbach alpha</b> |
|------------------------------------------|-----------------------|
| Version A – Practical judgment scenarios | 0.830                 |
| Version B – Practical judgment scenarios | 0.841                 |
| Version A – Moral judgment scenarios     | 0.883                 |
| Version B – Moral judgment scenarios     | 0.776                 |
| Version A – Social judgment scenarios    | 0.858                 |
| Version B – Social judgment scenarios    | 0.876                 |
